# Supplementary material for: Iron isotopic fractionation between silicate mantle and metallic core at high pressure
Source: PubMed Central journal article supplement (PMC5321738; doi:10.1038/ncomms14377), 2017-02-20
Supplement: ncomms14377-s1.pdf [file ncomms14377-s1.pdf]

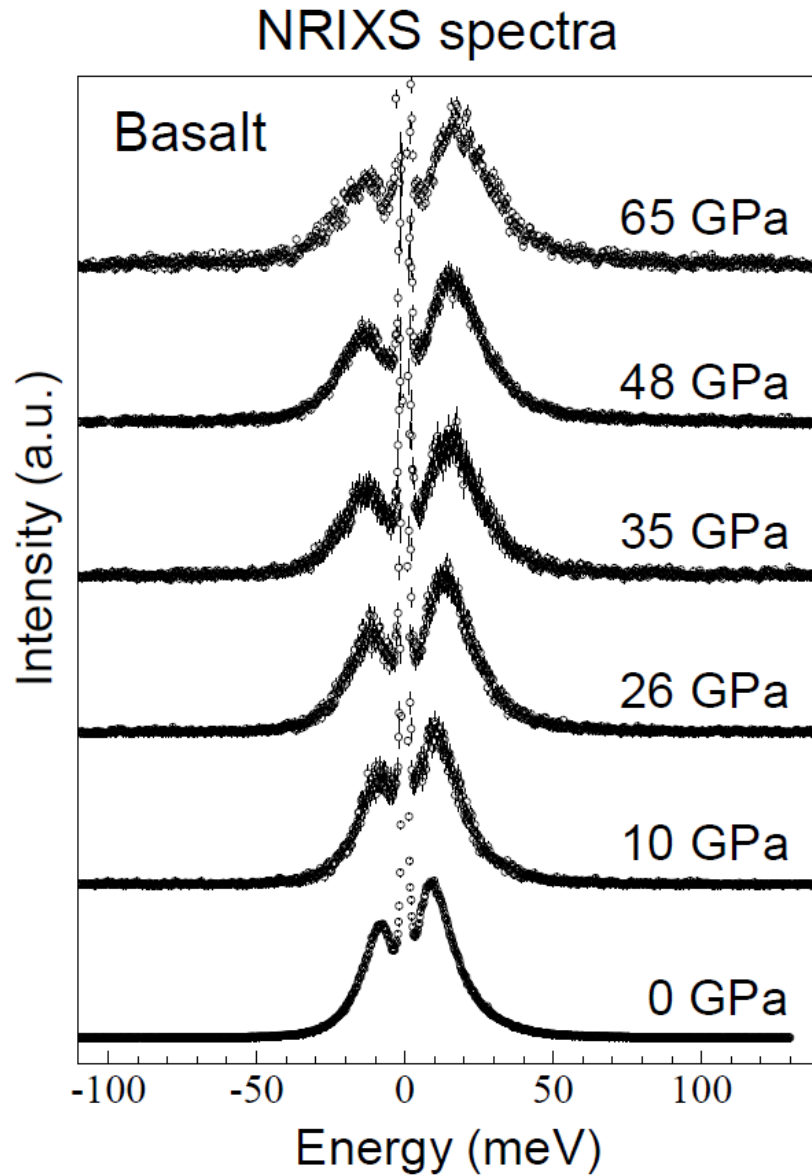

1

2

3 **Supplementary Figure 1** Representative NRIXS spectra of the basaltic glass and Fe-rich

4 alloys at high pressures. The central peaks at 0 meV correspond to the elastic scattering.

5 Open symbols: experimental data; vertical ticks: statistical errors.

6

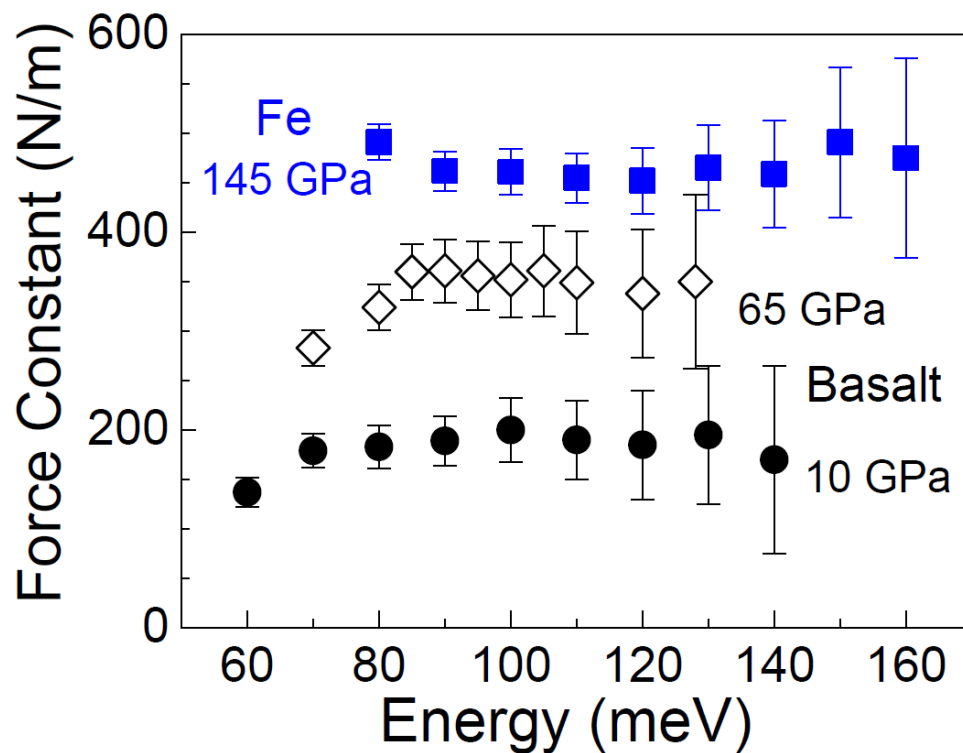

7

8

9 **Supplementary Figure 2** The force constants  $\langle F \rangle$  of basaltic glass and Fe determined  
 10 by SciPhon as a function of the energy range fitted in the analysis at high pressures. The  
 11 uncertainties increase with the fitted energy range, but the calculated  $\langle F \rangle$  values fall in a  
 12 narrow range when the fitted energy range is greater than ~90 meV.

13

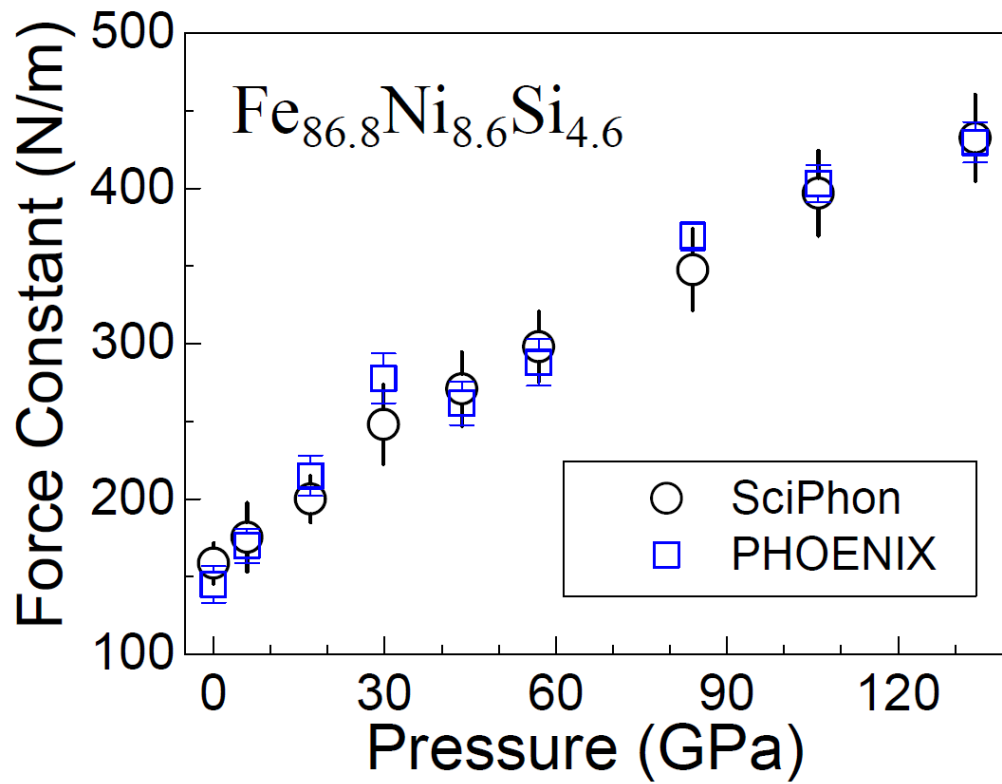

14

15

16 **Supplementary Figure 3** The mean force constants  $\langle F \rangle$  of bcc- and hcp- $\text{Fe}_{86.8}\text{Ni}_{8.6}\text{Si}_{4.6}$   
 17 alloy at high pressures.

18

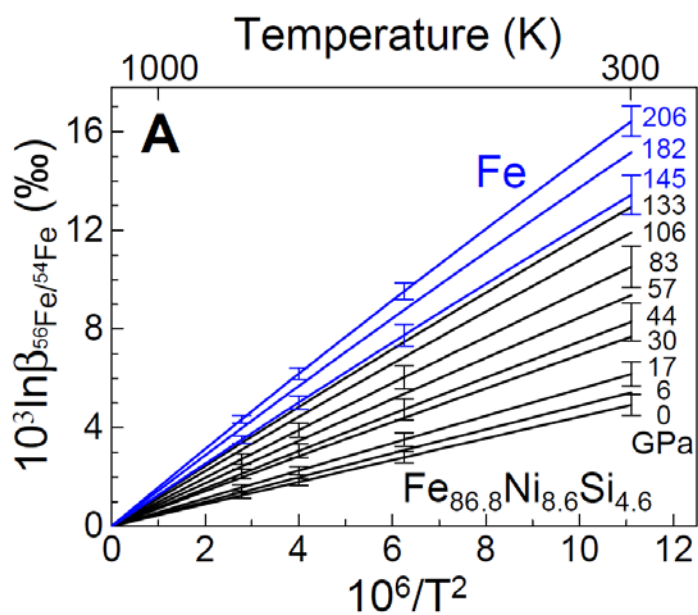

19

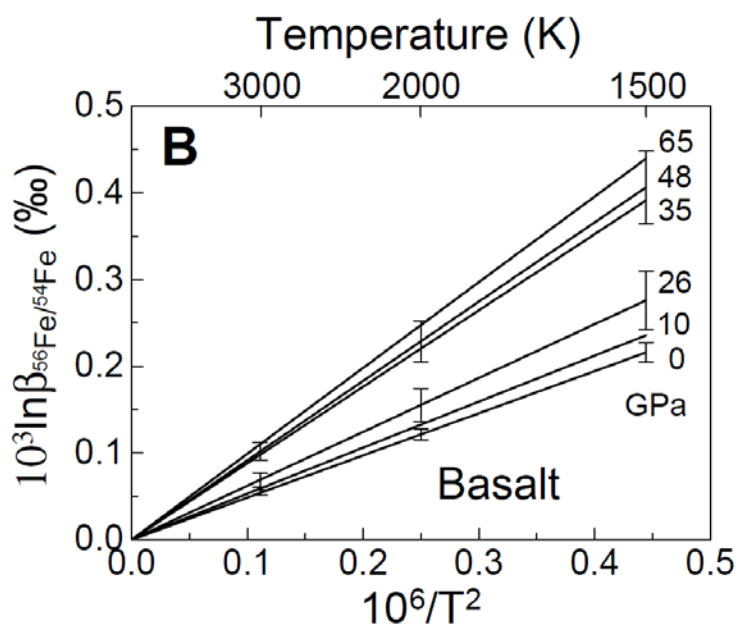

20

21

22 **Supplementary Figure 4** Temperature dependence of the  $^{56}\text{Fe}/^{54}\text{Fe}$   $\beta$ -factors for Fe and  
 23  $\text{Fe}_{86.8}\text{Ni}_{8.6}\text{Si}_{4.6}$  alloy (A) and the basaltic glass (B) at high pressures. The  $^{56}\text{Fe}/^{54}\text{Fe}$   $\beta$ -  
 24 factors and error bars are computed using the SciPhon software.

25

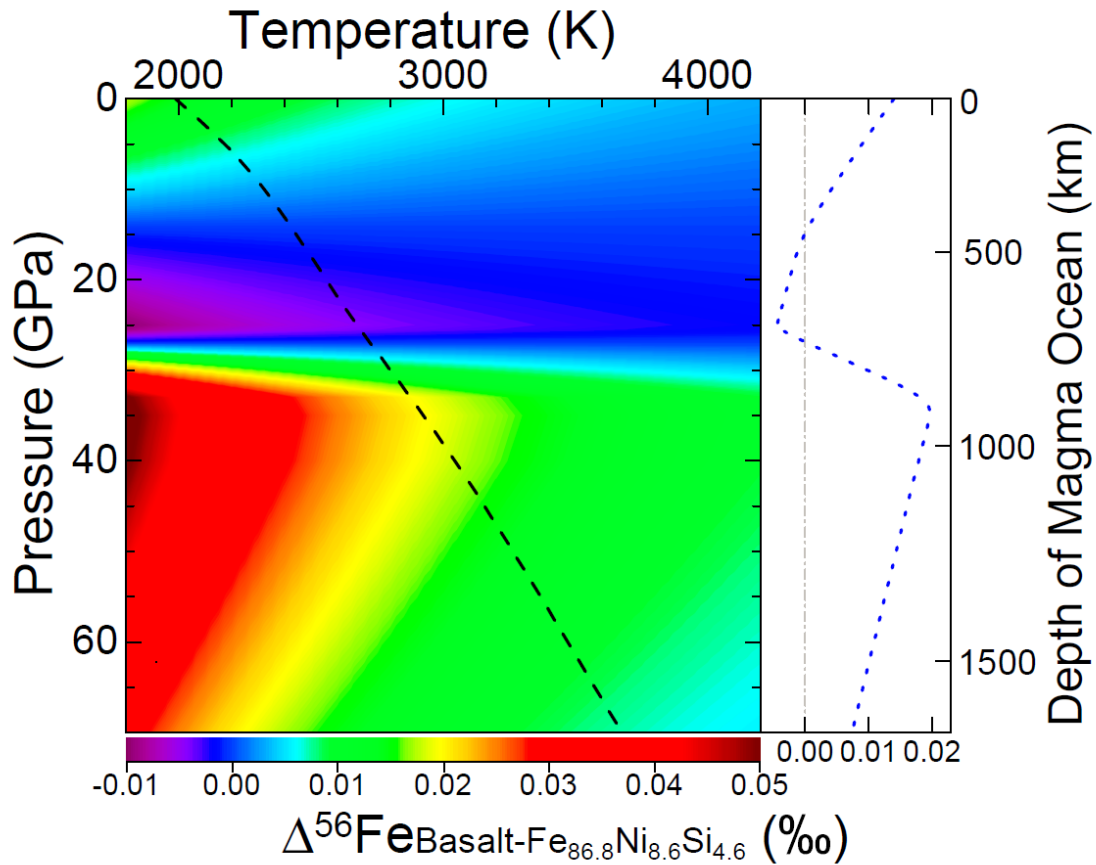

26

27

28 **Supplementary Figure 5** Equilibrium  $^{56}\text{Fe}/^{54}\text{Fe}$  isotope fractionation between basaltic  
 29 glass and  $\text{Fe}_{86.8}\text{Ni}_{8.6}\text{Si}_{4.6}$  alloy at high  $P$ - $T$  conditions with regard to varying depth of  
 30 magma ocean. Black dashed line: example of metal-silicate equilibration temperatures as  
 31 a function of pressure corresponding to the mantle liquidus; blue dotted line: iron isotopic  
 32 fractionation along the mantle liquidus with the varying depth of magma ocean; dash-  
 33 dotted lines represent no iron isotopic fractionation between basaltic glass and  
 34  $\text{Fe}_{86.8}\text{Ni}_{8.6}\text{Si}_{4.6}$  alloy. Two separate linear regressions were used for regressing the force  
 35 constant of iron bounds in basaltic glass below and above 26 GPa.

36

37

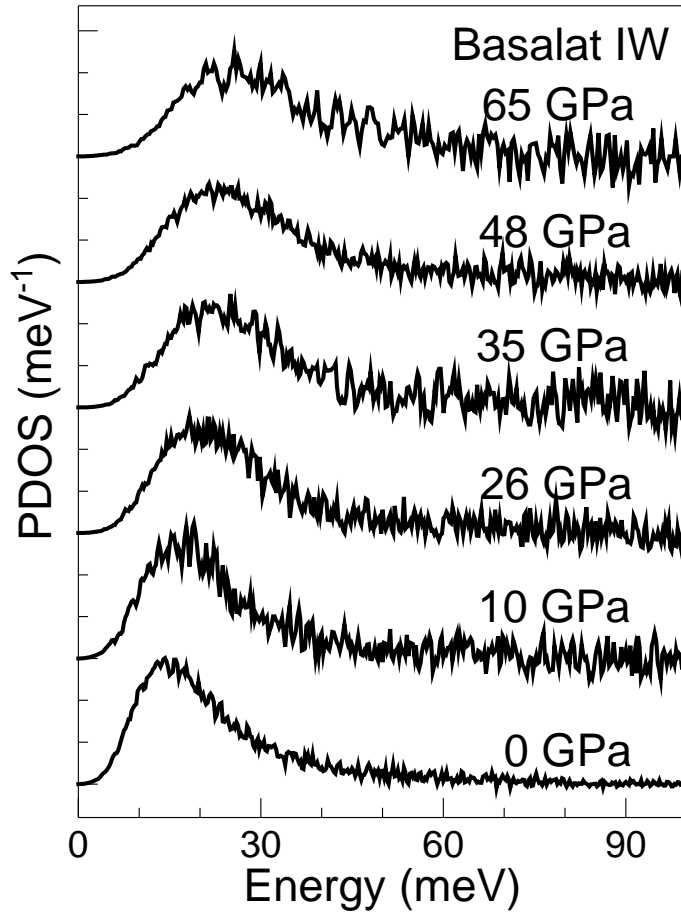

38

39

40 **Supplementary Figure 6** Phonon density of states (PDOS) of the basaltic glass from  
41 high-pressure NRIXS measurements using SciPhon.

42

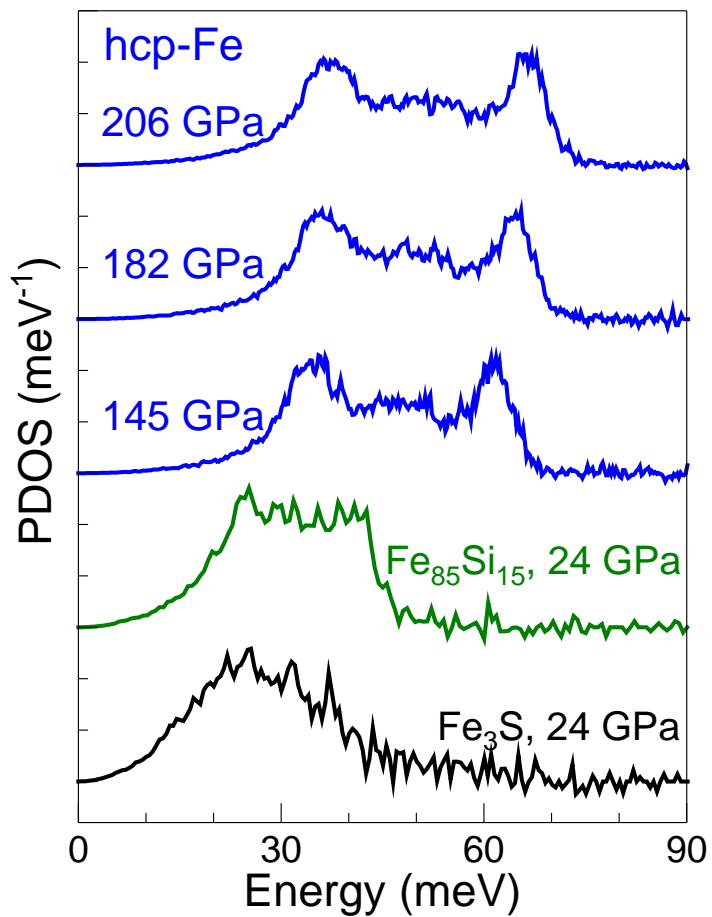

43

44

45 **Supplementary Figure 7** Phonon density of states (PDOS) of hcp-Fe,  $\text{Fe}_3\text{S}$ , and

46  $\text{Fe}_{85}\text{Si}_{15}$  from high-pressure NRIXS measurements using SciPhon.

47

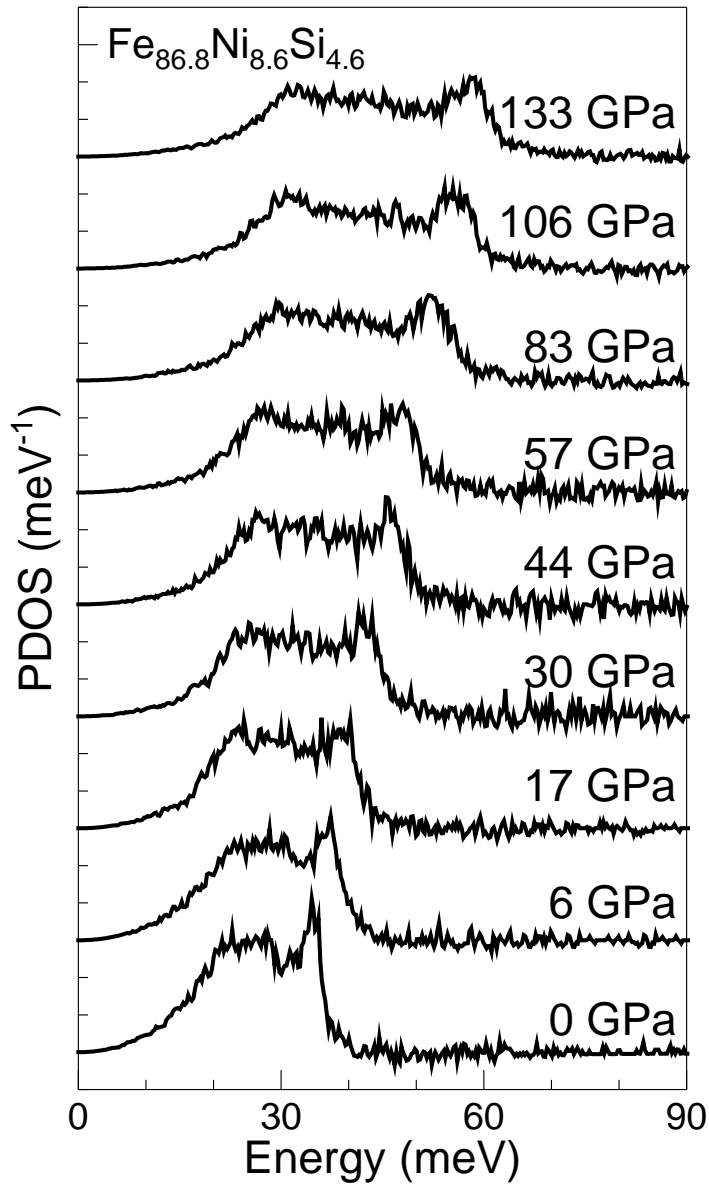

48

49

50 **Supplementary Figure 8** Phonon density of states (PDOS) of  $\text{Fe}_{86.8}\text{Ni}_{8.6}\text{Si}_{4.6}$  alloy from  
51 high-pressure NRIXS measurements using SciPhon.

52



53 **Supplementary Table 1** Experimental parameters for our NRIXS data collection.

| Sample                                                 | Pressure (GPa) | Energy Range (meV) <sup>¶</sup> | Number of Scans <sup>§</sup> | Scan Time (sec) <sup>†</sup> |
|--------------------------------------------------------|----------------|---------------------------------|------------------------------|------------------------------|
| Basaltic glass                                         | 0.0001         | -130 to +130                    | 8                            | 24                           |
| Basaltic glass                                         | 10             | -130 to +170                    | 20                           | 80                           |
| Basaltic glass                                         | 26             | -100 to +140                    | 20                           | 80                           |
| Basaltic glass                                         | 35             | -100 to +140                    | 29                           | 110                          |
| Basaltic glass                                         | 48             | -110 to +140                    | 45                           | 180                          |
| Basaltic glass                                         | 65             | -110 to +150                    | 47                           | 185                          |
| Fe                                                     | 145            | -110 to +180                    | 25                           | 125                          |
| Fe                                                     | 182            | -110 to +140                    | 28                           | 140                          |
| Fe                                                     | 206            | -110 to +140                    | 31                           | 155                          |
| Fe <sub>86.8</sub> Ni <sub>8.6</sub> Si <sub>4.6</sub> | 0.0001         | -110 to +110                    | 3                            | 10                           |
| Fe <sub>86.8</sub> Ni <sub>8.6</sub> Si <sub>4.6</sub> | 30             | -110 to +110                    | 29                           | 98                           |
| Fe <sub>86.8</sub> Ni <sub>8.6</sub> Si <sub>4.6</sub> | 44             | -110 to +110                    | 29                           | 105                          |
| Fe <sub>86.8</sub> Ni <sub>8.6</sub> Si <sub>4.6</sub> | 57             | -110 to +110                    | 25                           | 115                          |
| Fe <sub>86.8</sub> Ni <sub>8.6</sub> Si <sub>4.6</sub> | 83             | -110 to +110                    | 20                           | 100                          |
| Fe <sub>86.8</sub> Ni <sub>8.6</sub> Si <sub>4.6</sub> | 106            | -110 to +120                    | 20                           | 100                          |
| Fe <sub>86.8</sub> Ni <sub>8.6</sub> Si <sub>4.6</sub> | 133            | -110 to +120                    | 20                           | 100                          |
| Fe <sub>85</sub> Si <sub>15</sub>                      | 24             | -100 to +110                    | 31                           | 155                          |
| Fe <sub>3</sub> S                                      | 24             | -100 to +110                    | 27                           | 135                          |

54 <sup>¶</sup>The energy range over which NRIXS data was collected, relative to the nuclear  
55 transition energy of <sup>57</sup>Fe (14.4125 keV). For the Fe<sub>3</sub>S and Fe<sub>85</sub>Si<sub>15</sub> alloys, the scan step  
56 size was 0.5 meV with an energy resolution of 2 meV. For other samples, the scan step  
57 size was 0.25 meV with an energy resolution of 1 meV.

58 <sup>§</sup>It reflects the total number of scans at each energy step.

59 <sup>†</sup>It reflects the total seconds counted at each energy step.

60

61 **Supplementary Table 2** Thermoelastic properties derived from NRIXS data.

|                                                                                                                                          | Basaltic glass                 |                                 |                                 |                                 |                                 |                                 |
|------------------------------------------------------------------------------------------------------------------------------------------|--------------------------------|---------------------------------|---------------------------------|---------------------------------|---------------------------------|---------------------------------|
| Pressure (GPa)                                                                                                                           | 0.0001                         | 9.5 ± 0.3                       | 25.8 ± 0.6                      | 35.1 ± 0.7                      | 48.4 ± 1.2                      | 65.4 ± 1.6                      |
| Temperature from detailed balance (K):                                                                                                   | 308.0                          | 273.6                           | 287.1                           | 285.7                           | 304.2                           | 249.4                           |
| <b>Parameters from S</b>                                                                                                                 |                                |                                 |                                 |                                 |                                 |                                 |
| Lamb-Mössbauer factor from S                                                                                                             | 0.5651 ± 0.0023                | 0.6098 ± 0.0079                 | 0.7121 ± 0.0065                 | 0.7560 ± 0.0050                 | 0.7718 ± 0.0045                 | 0.8065 ± 0.0045                 |
| Mean square displacement $\langle z^2 \rangle$ from S (Å <sup>2</sup> )                                                                  | 0.01071 ± 0.00007              | 0.00928 ± 0.00023               | 0.00637 ± 0.00016               | 0.00525 ± 0.00013               | 0.00486 ± 0.00011               | 0.00404 ± 0.00012               |
| Internal energy/atom from S (meV)                                                                                                        | 28.54 ± 0.65                   | 28.37 ± 1.32                    | 28.73 ± 1.19                    | 30.97 ± 1.57                    | 31.07 ± 1.37                    | 30.92 ± 1.76                    |
| Kinetic energy/atom from S (meV)                                                                                                         | 14.27 ± 0.33                   | 14.18 ± 0.66                    | 14.37 ± 0.60                    | 15.49 ± 0.78                    | 15.54 ± 0.69                    | 15.46 ± 0.88                    |
| Force constant $\langle F \rangle$ from S (N/m)                                                                                          | 187.9 ± 9.1                    | 193.3 ± 20.0                    | 218.3 ± 26.4                    | 300.1 ± 29.6                    | 321.5 ± 33.1                    | 354.7 ± 32.4                    |
| <sup>56</sup> Fe/ <sup>54</sup> Fe β coefficients from S                                                                                 |                                |                                 |                                 |                                 |                                 |                                 |
| 1000 ln β = A <sub>1</sub> /T <sup>2</sup> + A <sub>2</sub> /T <sup>4</sup> + A <sub>3</sub> /T <sup>6</sup> (T in K)                    |                                |                                 |                                 |                                 |                                 |                                 |
| A <sub>1</sub>                                                                                                                           | 487045 ± 25835                 | 531800 ± 89153                  | 622806 ± 75323                  | 883840 ± 103139                 | 917433 ± 94375                  | 992225 ± 113249                 |
| A <sub>2</sub>                                                                                                                           | -2499859579 ± 362830903        | -2767067429 ± 1111830911        | -3278961493 ± 877251096         | -6604017352 ± 1349982531        | -6379030730 ± 1234995617        | -6577866750 ± 1461981888        |
| A <sub>3</sub>                                                                                                                           | 34037320533882 ± 9397226860024 | 32472515323750 ± 23534087360276 | 37048436253731 ± 17371347871280 | 97622780253959 ± 29600979463874 | 83879858886861 ± 27145185127542 | 75852479785072 ± 31707359296823 |
| 1000 ln β = B <sub>1</sub> $\langle F \rangle$ /T <sup>2</sup> -B <sub>1</sub> $\langle F \rangle$ <sup>2</sup> /T <sup>4</sup> (T in K) |                                |                                 |                                 |                                 |                                 |                                 |
| B <sub>1</sub>                                                                                                                           | 2853.4                         | 2853.4                          | 2853.4                          | 2853.4                          | 2853.4                          | 2853.4                          |
| B <sub>2</sub>                                                                                                                           | 73186.6                        | 69566.1                         | 60428.8                         | 57843.2                         | 52944.2                         | 47624.9                         |
| <b>Parameters from g</b>                                                                                                                 |                                |                                 |                                 |                                 |                                 |                                 |
| Lamb-Mössbauer factor from g                                                                                                             | 0.5627                         | 0.6081                          | 0.7106                          | 0.7554                          | 0.7713                          | 0.8048                          |
| Mean square displacement $\langle z^2 \rangle$ from g (Å <sup>2</sup> )                                                                  | 0.010790                       | 0.009334                        | 0.006412                        | 0.005263                        | 0.004873                        | 0.004076                        |
| d $\langle z^2 \rangle$ /dT (Å <sup>2</sup> /K)                                                                                          | 0.00003442                     | 0.00002959                      | 0.00001985                      | 0.00001596                      | 0.00001467                      | 0.00001208                      |
| Critical temperature (K):                                                                                                                | 545.3                          | 634.3                           | 945.2                           | 1175.9                          | 1279.2                          | 1554.1                          |
| Resilience (N/m):                                                                                                                        | 40.12                          | 46.66                           | 69.54                           | 86.48                           | 94.11                           | 114.3                           |
| Internal energy/atom from g (meV)                                                                                                        | 29.11                          | 28.98                           | 29.45                           | 31.74                           | 31.85                           | 31.74                           |
| Kinetic energy/atom from g (meV)                                                                                                         | 14.56                          | 14.49                           | 14.72                           | 15.87                           | 15.93                           | 15.87                           |
| Vibrational entropy (kb/atom)                                                                                                            | 1.367                          | 1.280                           | 1.151                           | 1.088                           | 1.045                           | 0.945                           |
| Helmholtz free energy (meV)                                                                                                              | -6.234                         | -4.098                          | -0.310                          | 3.612                           | 4.846                           | 7.327                           |
| Vibrational specific heat (kb/atom)                                                                                                      | 0.9519                         | 0.9300                          | 0.9157                          | 0.9251                          | 0.9154                          | 0.8818                          |
| Lamb-Mössbauer factor at T=0 from g                                                                                                      | 0.8845                         | 0.8941                          | 0.9093                          | 0.9155                          | 0.9191                          | 0.9273                          |
| Kinetic energy/atom at T=0 from g (meV)                                                                                                  | 5.977                          | 6.289                           | 7.005                           | 8.373                           | 8.641                           | 9.110                           |
| Force constant from g (N/m)                                                                                                              | 167.7                          | 184.7                           | 216.7                           | 306.0                           | 317.6                           | 345.4                           |
| <sup>56</sup> Fe/ <sup>54</sup> Fe β coefficients from g                                                                                 |                                |                                 |                                 |                                 |                                 |                                 |
| 1000 ln β = A <sub>1</sub> /T <sup>2</sup> + A <sub>2</sub> /T <sup>4</sup> + A <sub>3</sub> /T <sup>6</sup> (T in K)                    |                                |                                 |                                 |                                 |                                 |                                 |
| A <sub>1</sub>                                                                                                                           | 478517                         | 526915                          | 618314                          | 873225                          | 906297                          | 985619                          |
| A <sub>2</sub>                                                                                                                           | -2474782640                    | -2777684039                     | -3317972347                     | -6819420085                     | -6536563587                     | -6739161275                     |
| A <sub>3</sub>                                                                                                                           | 34675991241897                 | 35418631015657                  | 42528329767727                  | 121725877905789                 | 103724390199225                 | 95095457934447                  |
| Velocities from g                                                                                                                        |                                |                                 |                                 |                                 |                                 |                                 |
| Input density (g/cc)                                                                                                                     | 2.75                           | 3.05                            | 3.36                            | 3.51                            | 3.65                            | 3.83                            |
| Input bulk modulus (GPa)                                                                                                                 | 79                             | 120                             | 215                             | 265                             | 300                             | 350                             |
| Debye velocity (m/s)                                                                                                                     | 3422 ± 94                      | 3326 ± 173                      | 3753 ± 143                      | 4778 ± 155                      | 4845 ± 185                      | 4949 ± 155                      |
| p-wave velocity (m/s)                                                                                                                    | 6408 ± 57                      | 7132 ± 96                       | 8864 ± 75                       | 9966 ± 87                       | 10330 ± 103                     | 10810 ± 85                      |
| s-wave velocity (m/s)                                                                                                                    | 3042 ± 89                      | 2939 ± 165                      | 3307 ± 136                      | 4226 ± 147                      | 4282 ± 176                      | 4370 ± 147                      |
| Poisson ratio:                                                                                                                           | 0.355                          | 0.398                           | 0.419                           | 0.390                           | 0.396                           | 0.402                           |

|                                                                                                                                          | $\text{Fe}_{86.8}\text{Ni}_{8.6}\text{Si}_{4.6}$ |                               |                               |                                 |                               |                                 |
|------------------------------------------------------------------------------------------------------------------------------------------|--------------------------------------------------|-------------------------------|-------------------------------|---------------------------------|-------------------------------|---------------------------------|
| Pressure (GPa)                                                                                                                           | 0.0001                                           | 5.9 ± 0.2                     | 16.5 ± 0.4                    | 29.8 ± 0.9                      | 44.4 ± 1.1                    | 57.2 ± 1.4                      |
| Temperature from detailed balance (K):                                                                                                   | 293.8                                            | 281.9                         | 284.4                         | 260.2                           | 258.6                         | 261.7                           |
| <b>Parameters from S</b>                                                                                                                 |                                                  |                               |                               |                                 |                               |                                 |
| Lamb-Mössbauer factor from S                                                                                                             | 0.7520 ± 0.0050                                  | 0.7857 ± 0.0055               | 0.8048 ± 0.0046               | 0.8385 ± 0.0039                 | 0.8506 ± 0.0039               | 0.8625 ± 0.0036                 |
| Mean square displacement $\langle z^2 \rangle$ from S (Å <sup>2</sup> )                                                                  | 0.00535 ± 0.00012                                | 0.00453 ± 0.00016             | 0.00408 ± 0.00012             | 0.00331 ± 0.00010               | 0.00304 ± 0.00010             | 0.00278 ± 0.00008               |
| Internal energy/atom from S (meV)                                                                                                        | 28.24 ± 0.83                                     | 27.51 ± 1.32                  | 28.29 ± 0.92                  | 28.61 ± 1.35                    | 29.47 ± 1.22                  | 29.83 ± 1.12                    |
| Kinetic energy/atom from S (meV)                                                                                                         | 14.12 ± 0.41                                     | 13.75 ± 0.66                  | 14.15 ± 0.46                  | 14.31 ± 0.68                    | 14.74 ± 0.61                  | 14.92 ± 0.56                    |
| Force constant $\langle F \rangle$ from S (N/m)                                                                                          | 158.6 ± 13.2                                     | 175.3 ± 22.2                  | 199.9 ± 15.1                  | 248.1 ± 25.6                    | 270.8 ± 23.9                  | 298.1 ± 22.7                    |
| <sup>56</sup> Fe/ <sup>54</sup> Fe β coefficients from S                                                                                 |                                                  |                               |                               |                                 |                               |                                 |
| 1000 ln β = A <sub>1</sub> /T <sup>2</sup> + A <sub>2</sub> /T <sup>4</sup> + A <sub>3</sub> /T <sup>6</sup> (T in K)                    |                                                  |                               |                               |                                 |                               |                                 |
| A <sub>1</sub>                                                                                                                           | 452543 ± 37689                                   | 500101 ± 63283                | 570365 ± 43204                | 719377 ± 81629                  | 772589 ± 68435                | 880340 ± 64837                  |
| A <sub>2</sub>                                                                                                                           | -855972534 ± 382195770                           | -1090130245 ± 475271103       | -1363620558 ± 297332113       | -2672240644 ± 812264625         | -2427052410 ± 591330677       | -3516512957 ± 608821645         |
| A <sub>3</sub>                                                                                                                           | 2163092347903 ± 7521159222783                    | 2238583565501 ± 6279824759880 | 2019393441627 ± 3723379960435 | 16891344788688 ± 13915961179875 | 5211811252884 ± 9071118496761 | 16616074255008 ± 10152093922560 |
| 1000 ln β = B <sub>1</sub> $\langle F \rangle$ /T <sup>2</sup> -B <sub>1</sub> $\langle F \rangle$ <sup>2</sup> /T <sup>4</sup> (T in K) |                                                  |                               |                               |                                 |                               |                                 |
| B <sub>1</sub>                                                                                                                           | 2853.4                                           | 2853.4                        | 2853.4                        | 2853.4                          | 2853.4                        | 2853.4                          |
| B <sub>2</sub>                                                                                                                           | 33102.4                                          | 34702.4                       | 33583.2                       | 39173.1                         | 32339.1                       | 35058.9                         |
| <b>Parameters from g</b>                                                                                                                 |                                                  |                               |                               |                                 |                               |                                 |
| Lamb-Mössbauer factor from g                                                                                                             | 0.7514                                           | 0.7844                        | 0.8032                        | 0.8371                          | 0.8503                        | 0.8625                          |
| Mean square displacement $\langle z^2 \rangle$ from g (Å <sup>2</sup> )                                                                  | 0.005363                                         | 0.004557                      | 0.004113                      | 0.003336                        | 0.003043                      | 0.002776                        |
| d $\langle z^2 \rangle$ /dT (Å <sup>2</sup> /K)                                                                                          | 0.00001631                                       | 0.00001370                    | 0.00001220                    | 0.00000964                      | 0.00000862                    | 0.00000775                      |
| Critical temperature (K):                                                                                                                | 1150.7                                           | 1370.1                        | 1538.3                        | 1945.8                          | 2176.9                        | 2423.3                          |
| Resilience (N/m):                                                                                                                        | 84.66                                            | 100.8                         | 113.1                         | 143.2                           | 1.60.1                        | 178.2                           |
| Internal energy/atom from g (meV)                                                                                                        | 28.97                                            | 28.28                         | 29.10                         | 29.44                           | 30.32                         | 30.70                           |
| Kinetic energy/atom from g (meV)                                                                                                         | 14.49                                            | 14.14                         | 14.55                         | 14.72                           | 15.16                         | 15.35                           |
| Vibrational entropy (kb/atom)                                                                                                            | 1.148                                            | 1.039                         | 1.008                         | 0.904                           | 0.882                         | 0.831                           |
| Helmholtz free energy (meV)                                                                                                              | -0.702                                           | 1.426                         | 3.047                         | 6.085                           | 7.532                         | 9.216                           |
| Vibrational specific heat (kb/atom)                                                                                                      | 0.9500                                           | 0.9031                        | 0.9099                        | 0.8722                          | 0.8857                        | 0.8646                          |
| Lamb-Mössbauer factor at T=0 from g                                                                                                      | 0.9137                                           | 0.9223                        | 0.9252                        | 0.9330                          | 0.9349                        | 0.9383                          |
| Kinetic energy/atom at T=0 from g (meV)                                                                                                  | 6.548                                            | 6.813                         | 7.328                         | 8.081                           | 8.575                         | 9.070                           |
| Force constant from g (N/m)                                                                                                              | 155.5                                            | 175.2                         | 199.2                         | 252.1                           | 269.1                         | 307.9                           |
| <sup>56</sup> Fe/ <sup>54</sup> Fe β coefficients from g                                                                                 |                                                  |                               |                               |                                 |                               |                                 |
| 1000 ln β = A <sub>1</sub> /T <sup>2</sup> + A <sub>2</sub> /T <sup>4</sup> + A <sub>3</sub> /T <sup>6</sup> (T in K)                    |                                                  |                               |                               |                                 |                               |                                 |
| A <sub>1</sub>                                                                                                                           | 443667                                           | 499804                        | 568313                        | 719236                          | 767989                        | 878600                          |
| A <sub>2</sub>                                                                                                                           | -822858307                                       | -1085959414                   | -1401612555                   | -2703060703                     | -2452598552                   | -3612963004                     |
| A <sub>3</sub>                                                                                                                           | 2384925975050                                    | 3255968870400                 | 4989288511131                 | 21210514588007                  | 9623131674342                 | 25675744782979                  |
| Velocities from g                                                                                                                        |                                                  |                               |                               |                                 |                               |                                 |
| Input density (g/cc)                                                                                                                     | 7.705                                            | 7.957                         | 8.377                         | 9.157                           | 9.540                         | 9.865                           |
| Input bulk modulus (GPa)                                                                                                                 | 163                                              | 190                           | 235                           | 300                             | 370                           | 440                             |
| Debye velocity (m/s)                                                                                                                     | 3146 ± 54                                        | 3346 ± 68                     | 3523 ± 61                     | 3930 ± 101                      | 4080 ± 128                    | 4245 ± 84                       |
| p-wave velocity (m/s)                                                                                                                    | 5680 ± 36                                        | 5978 ± 46                     | 6416 ± 38                     | 7009 ± 64                       | 7507 ± 79                     | 7973 ± 213                      |
| s-wave velocity (m/s)                                                                                                                    | 2818 ± 51                                        | 2982 ± 64                     | 3136 ± 58                     | 3503 ± 96                       | 3630 ± 121                    | 3772 ± 81                       |
| Poisson ratio:                                                                                                                           | 0.290                                            | 0.334                         | 0.343                         | 0.334                           | 0.347                         | 0.356                           |

65 **Supplementary Table 2 Continued.**

|                                                                                                                       | Fe <sub>86.8</sub> Ni <sub>8.6</sub> Si <sub>4.6</sub> |                                 |                                 | Fe                              |                                 |                                 |
|-----------------------------------------------------------------------------------------------------------------------|--------------------------------------------------------|---------------------------------|---------------------------------|---------------------------------|---------------------------------|---------------------------------|
| Pressure (GPa)                                                                                                        | 83 ± 2                                                 | 106 ± 2                         | 133 ± 2                         | 145 ± 3                         | 182 ± 5                         | 206 ± 6                         |
| Temperature from detailed balance (K):                                                                                | 274.9                                                  | 281.6                           | 296.8                           | 284.1                           | 279.6                           | 286.4                           |
| <b>Parameters from S</b>                                                                                              |                                                        |                                 |                                 |                                 |                                 |                                 |
| Lamb-Mössbauer factor from S                                                                                          | 0.8820 ± 0.0030                                        | 0.8897 ± 0.0029                 | 0.8943 ± 0.0024                 | 0.9131 ± 0.0018                 | 0.9195 ± 0.0015                 | 0.9226 ± 0.0013                 |
| Mean square displacement <z <sup>2</sup> > from S (Å <sup>2</sup> )                                                   | 0.00236 ± 0.00007                                      | 0.00219 ± 0.00007               | 0.00210 ± 0.00006               | 0.00171 ± 0.00004               | 0.00158 ± 0.00004               | 0.00151 ± 0.00003               |
| Internal energy/atom from S (meV)                                                                                     | 29.96 ± 1.15                                           | 30.80 ± 1.13                    | 31.65 ± 1.12                    | 31.28 ± 0.93                    | 32.34 ± 0.95                    | 33.10 ± 0.78                    |
| Kinetic energy/atom from S (meV)                                                                                      | 14.98 ± 0.57                                           | 15.40 ± 0.57                    | 15.83 ± 0.56                    | 15.64 ± 0.46                    | 16.17 ± 0.48                    | 16.55 ± 0.39                    |
| Force constant <F> from S (N/m)                                                                                       | 347.6 ± 26.1                                           | 396.8 ± 27.5                    | 432.5 ± 27.9                    | 455.5 ± 24.6                    | 519.0 ± 22.6                    | 556.8 ± 19.1                    |
| <sup>56</sup> Fe/ <sup>54</sup> Fe β coefficients from S                                                              |                                                        |                                 |                                 |                                 |                                 |                                 |
| 1000 ln β = A <sub>1</sub> /T <sup>2</sup> + A <sub>2</sub> /T <sup>4</sup> + A <sub>3</sub> /T <sup>6</sup> (T in K) |                                                        |                                 |                                 |                                 |                                 |                                 |
| A <sub>1</sub>                                                                                                        | 991927 ± 74370                                         | 1132319 ± 78425                 | 1234114 ± 79486                 | 1279730 ± 70047                 | 1480916 ± 64577                 | 1588711 ± 54479                 |
| A <sub>2</sub>                                                                                                        | -4216363469 ± 891020969                                | -5862610202 ± 995909867         | -6539594439 ± 1108528014        | -6451244752 ± 1138807721        | -9812369629 ± 830672017         | -10967069895 ± 681878990        |
| A <sub>3</sub>                                                                                                        | 18283263766495 ± 18765311474413                        | 41211258369178 ± 22302386417286 | 39315685892788 ± 27037391424976 | 16002379437505 ± 33637922607805 | 83832202412996 ± 18605221856532 | 94771605498907 ± 14918563186621 |
| 1000 ln β = B <sub>1</sub> <F>/T <sup>2</sup> -B <sub>1</sub> <F> <sup>2</sup> /T <sup>4</sup> (T in K)               |                                                        |                                 |                                 |                                 |                                 |                                 |
| B <sub>1</sub>                                                                                                        | 2853.4                                                 | 2853.4                          | 2853.4                          | 2853.4                          | 2853.4                          | 2853.4                          |
| B <sub>2</sub>                                                                                                        | 33257.1                                                | 34403.2                         | 32690.4                         | 31214.1                         | 33067.6                         | 32076.3                         |
| <b>Parameters from g</b>                                                                                              |                                                        |                                 |                                 |                                 |                                 |                                 |
| Lamb-Mössbauer factor from g                                                                                          | 0.8818                                                 | 0.8897                          | 0.8937                          | 0.9131                          | 0.9195                          | 0.9222                          |
| Mean square displacement <z <sup>2</sup> > from g (Å <sup>2</sup> )                                                   | 0.002360                                               | 0.002194                        | 0.002108                        | 0.001706                        | 0.001576                        | 0.001520                        |
| d<z <sup>2</sup> >/dT (Å <sup>2</sup> /K)                                                                             | 0.00000640                                             | 0.00000584                      | 0.00000555                      | 0.00000425                      | 0.00000382                      | 0.00000363                      |
| Critical temperature (K):                                                                                             | 2933.2                                                 | 3210.7                          | 3380.2                          | 4418.2                          | 4912.1                          | 5168.9                          |
| Resilience (N/m):                                                                                                     | 215.8                                                  | 236.22                          | 248.7                           | 325.0                           | 361.3                           | 380.3                           |
| Internal energy/atom from g (meV)                                                                                     | 30.83                                                  | 31.68                           | 32.53                           | 32.18                           | 33.27                           | 34.03                           |
| Kinetic energy/atom from g (meV)                                                                                      | 15.42                                                  | 15.84                           | 16.27                           | 16.09                           | 16.64                           | 17.01                           |
| Vibrational entropy (kb/atom)                                                                                         | 0.7507                                                 | 0.7156                          | 0.6947                          | 0.6320                          | 0.5960                          | 0.5776                          |
| Helmholtz free energy (meV)                                                                                           | 11.43                                                  | 13.18                           | 14.57                           | 15.84                           | 17.86                           | 19.10                           |
| Vibrational specific heat (kb/atom)                                                                                   | 0.8301                                                 | 0.8188                          | 0.8182                          | 0.7857                          | 0.7686                          | 0.7644                          |
| Lamb-Mössbauer factor at T=0 from g                                                                                   | 0.9438                                                 | 0.9460                          | 0.9471                          | 0.9518                          | 0.9538                          | 0.9547                          |
| Kinetic energy/atom at T=0 from g (meV)                                                                               | 9.618                                                  | 10.252                          | 10.789                          | 11.001                          | 11.778                          | 12.267                          |
| Force constant from g (N/m)                                                                                           | 347.1                                                  | 396.0                           | 430.0                           | 447.6                           | 519.6                           | 556.2                           |
| <sup>56</sup> Fe/ <sup>54</sup> Fe β coefficients from g                                                              |                                                        |                                 |                                 |                                 |                                 |                                 |
| 1000 ln β = A <sub>1</sub> /T <sup>2</sup> + A <sub>2</sub> /T <sup>4</sup> + A <sub>3</sub> /T <sup>6</sup> (T in K) |                                                        |                                 |                                 |                                 |                                 |                                 |
| A <sub>1</sub>                                                                                                        | 990350                                                 | 1129919                         | 1227060                         | 1277132                         | 1482542                         | 1587030                         |
| A <sub>2</sub>                                                                                                        | -4202140113                                            | -5889817709                     | -6487299080                     | -6361250530                     | -10040066520                    | -11149521537                    |
| A <sub>3</sub>                                                                                                        | 21957997504812                                         | 49902621168849                  | 44822737751239                  | 15813392696196                  | 111690071429084                 | 123201152115770                 |
| Velocities from g                                                                                                     |                                                        |                                 |                                 |                                 |                                 |                                 |
| Input density (g/cc)                                                                                                  | 10.42                                                  | 10.84                           | 11.28                           | 12.04                           | 12.30                           | 12.89                           |
| Input bulk modulus (GPa)                                                                                              | 565                                                    | 670                             | 815                             | 880                             | 970                             | 1160                            |
| Debye velocity (m/s)                                                                                                  | 4549 ± 89                                              | 4614 ± 69                       | 4636 ± 67                       | 5641 ± 90                       | 5931 ± 102                      | 5812 ± 80                       |
| p-wave velocity (m/s)                                                                                                 | 8718 ± 53                                              | 9171 ± 40                       | 9729 ± 38                       | 10330 ± 202                     | 10770 ± 218                     | 11202 ± 221                     |
| s-wave velocity (m/s)                                                                                                 | 4039 ± 85                                              | 4090 ± 65                       | 4100 ± 64                       | 5021 ± 86                       | 5281 ± 98                       | 5159 ± 77                       |
| Poisson ratio:                                                                                                        | 0.363                                                  | 0.376                           | 0.392                           | 0.345                           | 0.342                           | 0.365                           |

67 **Supplementary Table 2 Continued.**

|                                                                                                                       | Fe <sub>85</sub> Si <sub>15</sub> | Fe <sub>3</sub> S               |
|-----------------------------------------------------------------------------------------------------------------------|-----------------------------------|---------------------------------|
| Pressure (GPa)                                                                                                        | 24.4 ± 0.9                        | 24.0 ± 0.9                      |
| Temperature from detailed balance (K):                                                                                | 294.9                             | 276.7                           |
| <b>Parameters from S</b>                                                                                              |                                   |                                 |
| Lamb-Mössbauer factor from S                                                                                          | 0.8161 ± 0.0059                   | 0.7597 ± 0.0076                 |
| Mean square displacement <z <sup>2</sup> > from S (Å <sup>2</sup> )                                                   | 0.00381 ± 0.00013                 | 0.00516 ± 0.00018               |
| Internal energy/atom from S (meV)                                                                                     | 29.13 ± 1.10                      | 28.38 ± 1.29                    |
| Kinetic energy/atom from S (meV)                                                                                      | 14.56 ± 0.55                      | 14.19 ± 0.64                    |
| Force constant <F> from S (N/m)                                                                                       | 233.8 ± 20.6                      | 214.2 ± 25.7                    |
| <sup>56</sup> Fe/ <sup>54</sup> Fe β coefficients from S                                                              |                                   |                                 |
| 1000 ln β = A <sub>1</sub> /T <sup>2</sup> + A <sub>2</sub> /T <sup>4</sup> + A <sub>3</sub> /T <sup>6</sup> (T in K) |                                   |                                 |
| A <sub>1</sub>                                                                                                        | 667065 ± 58689                    | 611129 ± 73337                  |
| A <sub>2</sub>                                                                                                        | -1976006890 ± 510139781           | -2136152467 ± 647675781         |
| A <sub>3</sub>                                                                                                        | 6981558744210 ± 7922442915825     | 11606862101993 ± 10047243487594 |
| 1000 ln β = B <sub>1</sub> <F>/T <sup>2</sup> -B <sub>1</sub> <F> <sup>2</sup> /T <sup>4</sup> (T in K)               |                                   |                                 |
| B <sub>1</sub>                                                                                                        | 2853.4                            | 2853.4                          |
| B <sub>2</sub>                                                                                                        | 34777.0                           | 43836                           |
| <b>Parameters from g</b>                                                                                              |                                   |                                 |
| Lamb-Mössbauer factor from g                                                                                          | 0.8097                            | 0.7554                          |
| Mean square displacement <z <sup>2</sup> > from g (Å <sup>2</sup> )                                                   | 0.003961                          | 0.005264                        |
| d<z <sup>2</sup> >/dT (Å <sup>2</sup> /K)                                                                             | 0.00001185                        | 0.00001616                      |
| Critical temperature (K):                                                                                             | 1583.5                            | 1161.2                          |
| Resilience (N/m):                                                                                                     | 116.5                             | 85.4                            |
| Internal energy/atom from g (meV)                                                                                     | 29.94                             | 29.14                           |
| Kinetic energy/atom from g (meV)                                                                                      | 14.97                             | 14.57                           |
| Vibrational entropy (kb/atom)                                                                                         | 0.9712                            | 1.0436                          |
| Helmholtz free energy (meV)                                                                                           | 4.83                              | 2.16                            |
| Vibrational specific heat (kb/atom)                                                                                   | 0.9097                            | 0.9002                          |
| Lamb-Mössbauer factor at T=0 from g                                                                                   | 0.9277                            | 0.9196                          |
| Kinetic energy/atom at T=0 from g (meV)                                                                               | 7.914                             | 7.29                            |
| Force constant from g (N/m)                                                                                           | 231.3                             | 213.5                           |
| <sup>56</sup> Fe/ <sup>54</sup> Fe β coefficients from g                                                              |                                   |                                 |
| 1000 ln β = A <sub>1</sub> /T <sup>2</sup> + A <sub>2</sub> /T <sup>4</sup> + A <sub>3</sub> /T <sup>6</sup> (T in K) |                                   |                                 |
| A <sub>1</sub>                                                                                                        | 660128                            | 609216                          |
| A <sub>2</sub>                                                                                                        | -1970292046                       | -2162540081                     |
| A <sub>3</sub>                                                                                                        | 9646711326442                     | 14898422858483                  |
| Velocities from g                                                                                                     |                                   |                                 |
| Input density (g/cc)                                                                                                  | 8.50                              | 7.98                            |
| Input bulk modulus (GPa)                                                                                              | 275                               | 280                             |
| Debye velocity (m/s)                                                                                                  | 3583 ± 91                         | 2930 ± 54                       |
| p-wave velocity (m/s)                                                                                                 | 6772 ± 152                        | 6633 ± 195                      |
| s-wave velocity (m/s)                                                                                                 | 3183 ± 87                         | 2585 ± 52                       |
| Poisson ratio:                                                                                                        | 0.358                             | 0.410                           |
